# Supplementary material for: Converting molecular layer deposited alucone films into Al2O3/alucone hybrid multilayers by plasma densification
Source: Royal Society of Chemistry journal article supplement (doi:10.1039/d0dt03896b), 2020-12-17
Supplement: d0dt03896b1.pdf [file d0dt03896b1.pdf]

**Supporting information for ‘Converting Molecular Layer Deposited  
alucone films into Al<sub>2</sub>O<sub>3</sub>/alucone inorganic/hybrid multilayers by  
plasma densification.’**

Juan Santo Domingo Peñaranda<sup>a\*</sup>, Mikko Nisula<sup>a</sup>, Sofie S. T.  
Vandenbroucke<sup>a,b</sup>, Matthias M. Minjauw<sup>a</sup>, Jin Li<sup>a</sup>, Andreas Webrouck<sup>a</sup>,  
Jonas Keukelier<sup>a,b</sup>, Andrea I. Pitillas Martínez<sup>a,b,c</sup>, Jolien Dendooven<sup>a</sup>,  
Christophe Detavernier<sup>a</sup>.

<sup>a</sup>*Department of Solid State Sciences, CoCooN research group, Ghent University,  
Krijgslaan 281, building S1, 9000 Gent (Belgium)*

<sup>b</sup>*IMEC, Kapeldreef 75, B-3001 Leuven, Belgium*

<sup>c</sup>*M2S, Centre for Surface Chemistry and Catalysis, University of Leuven, Celestijnenlaan  
200F, B-3001 Leuven*

## SUPPORTING INFORMATION

### LIST OF FIGURES

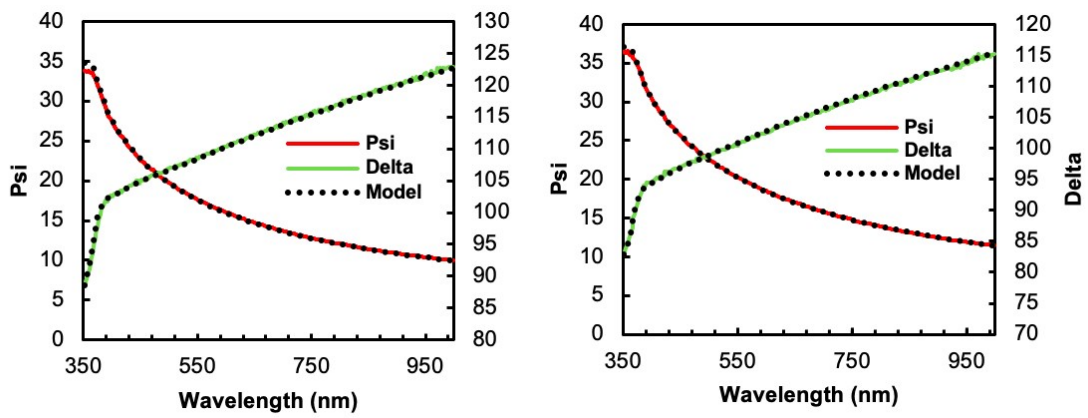

Figure S1. Raw psi/delta ellipsometry data of first (a) and last point (b) of an example (Figure 1) O<sub>2</sub> plasma densification process.

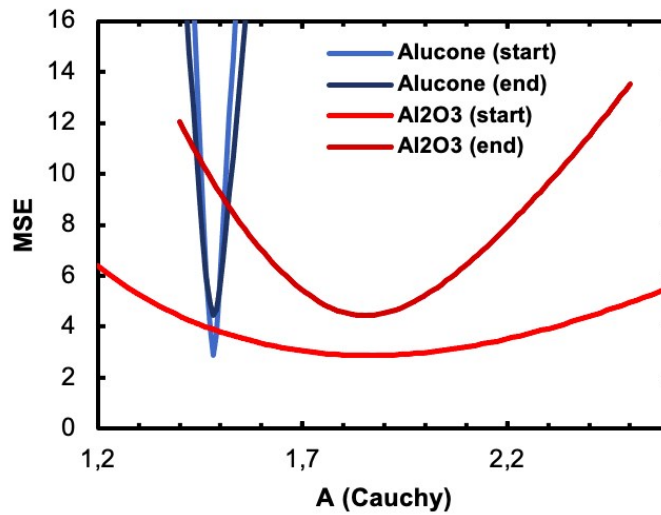

Figure S2. Ellipsometry error variation with respect to changing alucone/Al<sub>2</sub>O<sub>3</sub> refractive indexes.

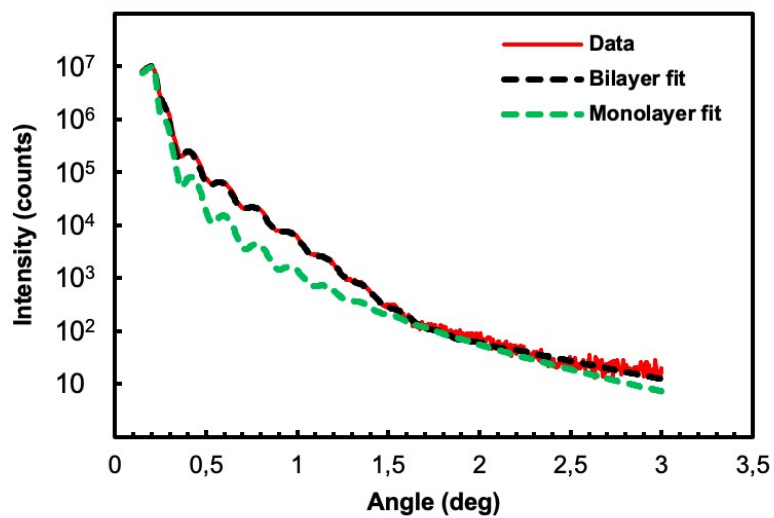

**Figure S3.** X-ray reflectivity data of a sample after densification, fitted with a monolayer model (green) and a bilayer model (black).

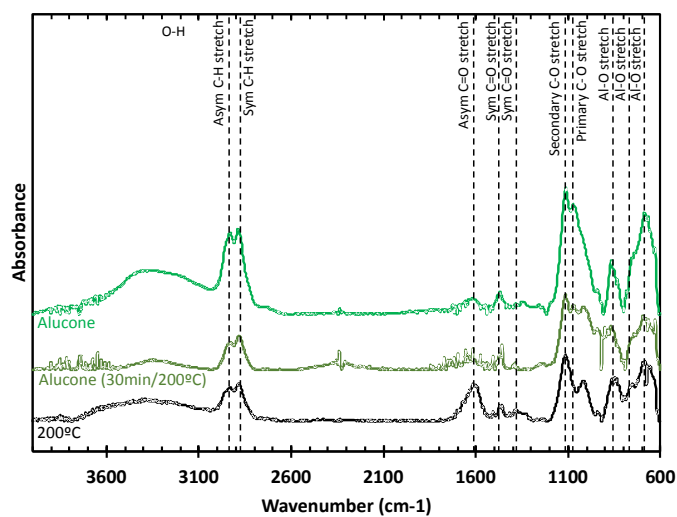

**Figure S4.** FTIR comparison between a pristine alucone, an alucone deposited and left for 30 minutes inside the reactor chamber at 200°C; and an alucone densified at 200°C.

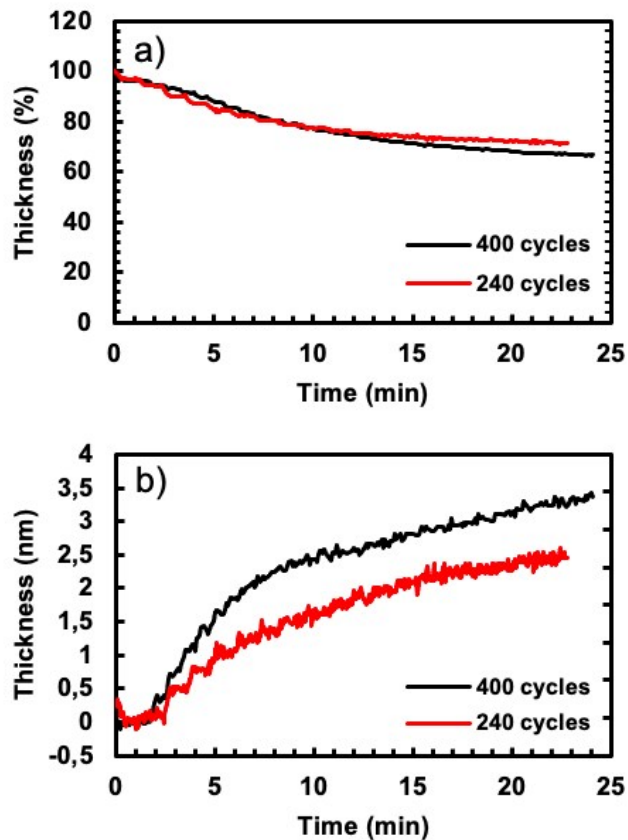

**Figure S5.** a) Alucone removal in percentage (%) of original film remaining at different thickness levels. b)  $\text{Al}_2\text{O}_3$  formation in nm with plasma exposure time (normalized).

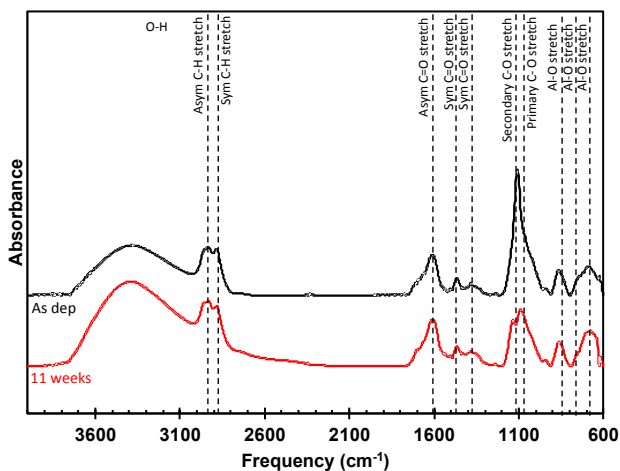

**Figure S6.** FTIR comparison of an alucone/ $\text{Al}_2\text{O}_3$  multistack as-deposited (black) and after aging in air for 11 weeks (red).



## XRR TABLES

**Table S1.** Thickness values of alucone/ $\text{Al}_2\text{O}_3$  pre- and post-densification, densified at different temperatures. Data was collected by SE (top) and XRR (bottom).

| Film                                                       | Technique used | 50°C  | 100°C | 200°C |
|------------------------------------------------------------|----------------|-------|-------|-------|
| Original alucone thickness (nm)                            | SE             | 25.27 | 31.25 | 30.09 |
| Alucone thickness after densification (nm)                 | SE             | 17.41 | 22.33 | 14.96 |
| $\text{Al}_2\text{O}_3$ thickness after densification (nm) | SE             | 2.70  | 2.63  | 2.4   |
| Alucone/Original thickness ratio                           |                | 0.69  | 0.71  | 0.50  |

|                                                            |     |       |       |       |
|------------------------------------------------------------|-----|-------|-------|-------|
| Original alucone thickness (nm)                            | SE  | 25.27 | 31.25 | 30.09 |
| Alucone thickness after densification (nm)                 | XRR | 17.77 | 21.11 | 21.82 |
| $\text{Al}_2\text{O}_3$ thickness after densification (nm) | XRR | 2.37  | 2.18  | 2.78  |
| Alucone/Original thickness ratio                           |     | 0.70  | 0.68  | 0.73  |

**Table S2.** Thickness values of alucone/ $\text{Al}_2\text{O}_3$  pre- and post-densification, densified at different plasma power settings. Data was collected by SE (top) and XRR (bottom).

| Film                                                       | Technique used | 140W  | 75W   |
|------------------------------------------------------------|----------------|-------|-------|
| Original alucone thickness (nm)                            | SE             | 30.94 | 31.25 |
| Alucone thickness after densification (nm)                 | SE             | 21.57 | 22.33 |
| $\text{Al}_2\text{O}_3$ thickness after densification (nm) | SE             | 3.00  | 2.63  |
| Alucone/Original thickness ratio                           |                | 0.70  | 0.71  |

|                                                            |     |       |       |
|------------------------------------------------------------|-----|-------|-------|
| Original alucone thickness (nm)                            | SE  | 30.94 | 31.25 |
| Alucone thickness after densification (nm)                 | XRR | 20.78 | 21.11 |
| $\text{Al}_2\text{O}_3$ thickness after densification (nm) | XRR | 1.92  | 2.18  |
| Alucone/Original thickness ratio                           |     | 0.67  | 0.68  |

**Table S3.** Thickness values of alucone/ $\text{Al}_2\text{O}_3$  pre- and post-densification, densified at different thickness levels. Data was collected by SE (top) and XRR (bottom).

| Film                                                       | Technique used | 240cyc | 400cyc |
|------------------------------------------------------------|----------------|--------|--------|
| Original alucone thickness (nm)                            | SE             | 31.25  | 44.42  |
| Alucone thickness after densification (nm)                 | SE             | 22.33  | 29.61  |
| $\text{Al}_2\text{O}_3$ thickness after densification (nm) | SE             | 2.63   | 3.01   |
| Alucone/Original thickness ratio                           |                | 0.71   | 0.67   |

|                                                            |     |       |       |
|------------------------------------------------------------|-----|-------|-------|
| Original alucone thickness (nm)                            | SE  | 31.25 | 44.42 |
| Alucone thickness after densification (nm)                 | XRR | 21.11 | 28.71 |
| $\text{Al}_2\text{O}_3$ thickness after densification (nm) | XRR | 2.18  | 2.74  |
| Alucone/Original thickness ratio                           |     | 0.68  | 0.65  |
